# Supplementary material for: Bismuth oxide nanoparticles as a nanoscale guide to form a silver–polydopamine hybrid electrocatalyst with enhanced activity and stability for the oxygen reduction reaction
Source: Royal Society of Chemistry journal article supplement (doi:10.1039/c4ra12989j), 2014-12-05
Supplement: c4ra12989j1.pdf [file c4ra12989j1.pdf]

1 Electronic supplementary information

2 **Bismuth oxide nanoparticle as a nanoscale guide to form silver-polydopamine**  
3 **hybrid electrocatalyst with enhanced activity and stability for oxygen reduction**  
4 **reaction**

5 Settu Murali, Jen-Lin Chang and Jyh-Myng Zen\*

6 *Department of Chemistry, National Chung Hsing University, Taichung 40227, Taiwan.*

7 *E-mail: jmzen@dragon.nchu.edu.tw, Tel/Fax: +886 4 22850864, +886 4 22854007.*

8

9

10 Dopamine polymerization was clearly verified based on the color-changing reaction  
11 of  $\text{Bi}_2\text{O}_3$  from yellow to dark black during composite formation in reaction mixture within 4  
12 hours.

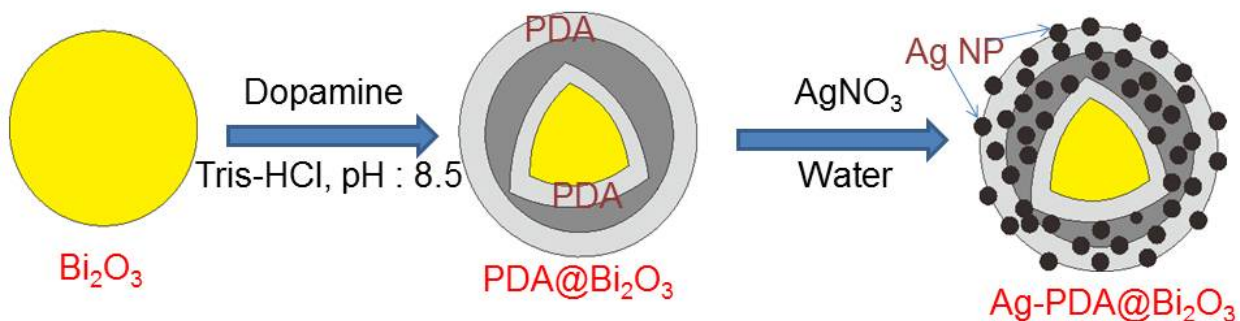

13

14 Figure S1: Schematic representation of the Ag-PDA@Bi<sub>2</sub>O<sub>3</sub> preparation

15

16

17 1.1 Synthesis of Ag-PDA

18 Dopamine (100 mg) was dissolved in 10 mM Tris-HCl (pH 8.5) solution under  
19 continuous stirring for 12 h. The obtained suspension was centrifuged, washed with DD  
20 water and dried at 60°C. After that, 5 mg of PDA powder was dispersed in water with 10  
21 min sonication and 2 mM AgNO<sub>3</sub> was added into this solution with 2 h stirring. Then the  
22 solution was centrifuged, washed with distilled water and dried at 60°C for further  
23 characterization.

24

## 25 1.2 Synthesis of Ag-Bi<sub>2</sub>O<sub>3</sub>

26 Bi<sub>2</sub>O<sub>3</sub> nanoparticle (5 mg) was dispersed in water with 10 min sonication and 2 mM  
27 AgNO<sub>3</sub> was added into this solution with 2 h stirring. Then the solution was centrifuged,  
28 washed with distilled water and dried at 60°C for further characterization.

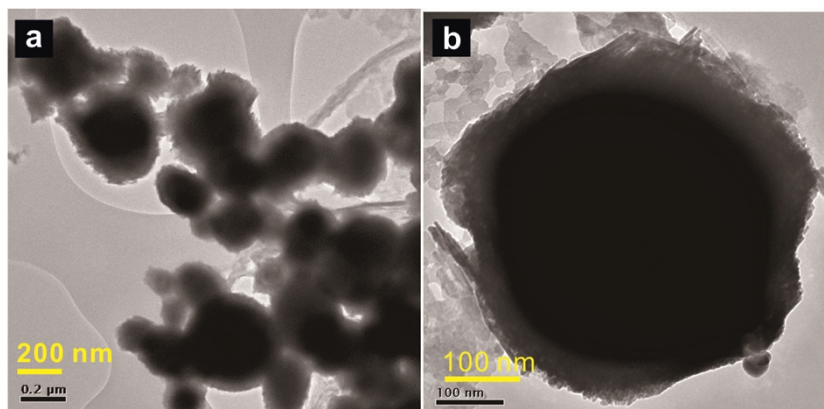

29

30 Figure S2: HR-TEM images of different Bi<sub>2</sub>O<sub>3</sub> nanoparticle (a) and single TEM image of Ag-  
31 Bi<sub>2</sub>O<sub>3</sub> (b)

32

33

34

35

36

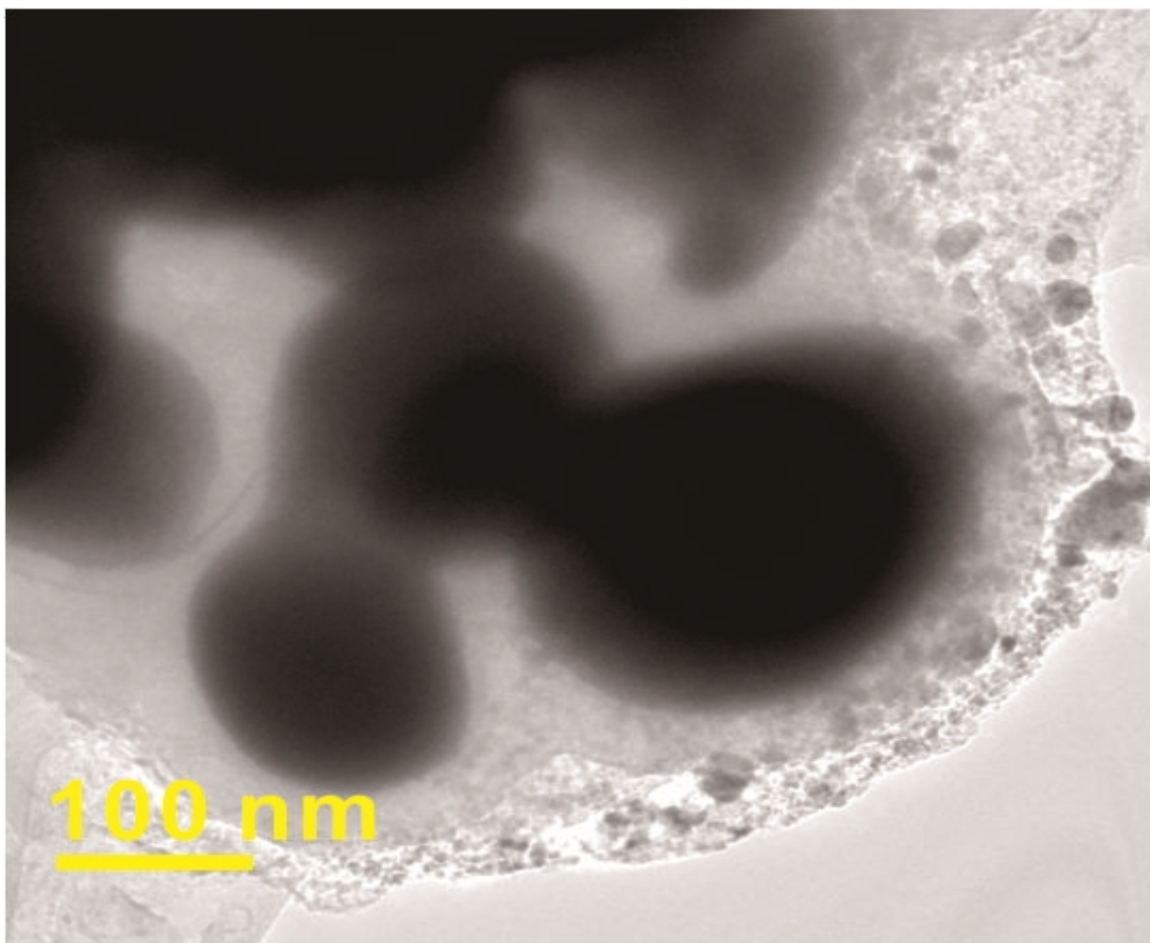

37

38 Figure S3: HR-TEM images of Ag-PDA@Bi<sub>2</sub>O<sub>3</sub>.

39

40

41

42

43

44

45

46

47 Table S1: Different particle size variation of Ag on PDA@Bi<sub>2</sub>O<sub>3</sub> in HR-TEM image

48

| No of Particle                                           | Particle size / nm | No of Particle | Particle size / nm |
|----------------------------------------------------------|--------------------|----------------|--------------------|
| 1                                                        | 57.11              | 7              | 31.27              |
| 2                                                        | 39.57              | 8              | 27.90              |
| 3                                                        | 42.92              | 9              | 45.72              |
| 4                                                        | 17.65              | 10             | 21.21              |
| 5                                                        | 34.43              | 11             | 36.38              |
| 6                                                        | 32.88              | 12             | 27.75              |
| Maximum/nm: 57.11<br>Minimum/nm: 17.65<br>Mean/nm: 34.59 |                    |                |                    |

49

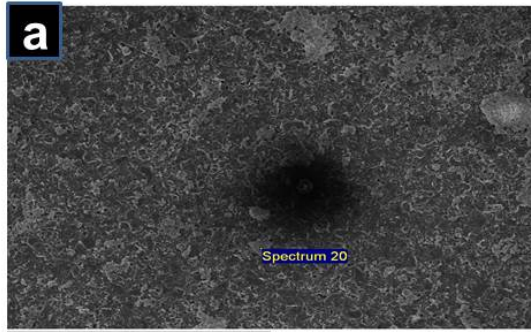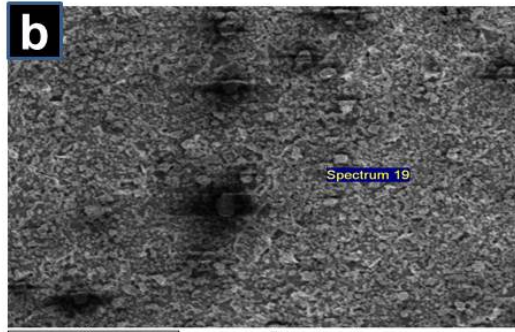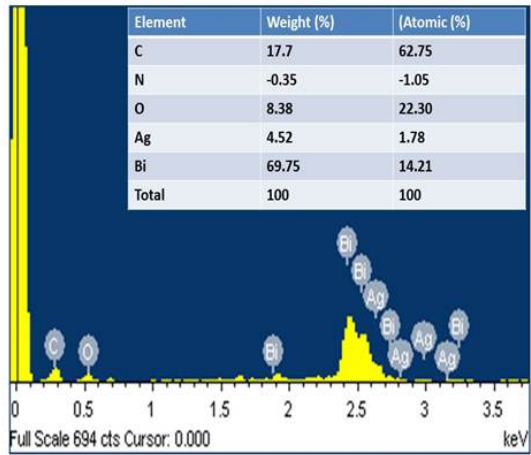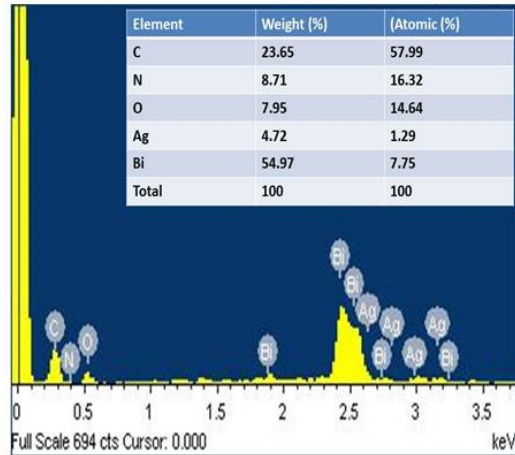

50

51 Figure S4: EDX spectrum of Ag-Bi<sub>2</sub>O<sub>3</sub> (a) and Ag-PDA@Bi<sub>2</sub>O<sub>3</sub> (b)

52

53

54

55

56

57

58

59

60

61

62

63 2. Oxygen reduction reaction:

64 Electroactive surface area of the modified electrode surface was calculated from the

65 Randles-Sevcik equation:

$$66 \quad i_p = 0.4463nFAC\left(\frac{nFvD}{RT}\right)^{1/2}$$

67 where  $i_p$  is the current maximum (amps), n is the number of electrons transferred in the

68 redox event, A is electrode Area ( $\text{cm}^2$ ), F is the Faraday constant ( $\text{C mol}^{-1}$ ), D is the diffusion

69 coefficient ( $\text{cm}^2/\text{s}$ ), C is the concentration of redox solution, v is the scan rate (V/s).

70 Potassium ferricyanide solution (5 mM) was used as a redox probe ( $\text{Fe}^{3+}/\text{Fe}^{2+}$ ) for

71 calculating electroactive area. Figure S2 shows cyclic voltammetry of ferricyanide redox

72 peak in 0.1 M  $\text{KNO}_3$  at a scan rate of 50 mV/s. The redox current was used to evaluate the

73 electroactive surface area.

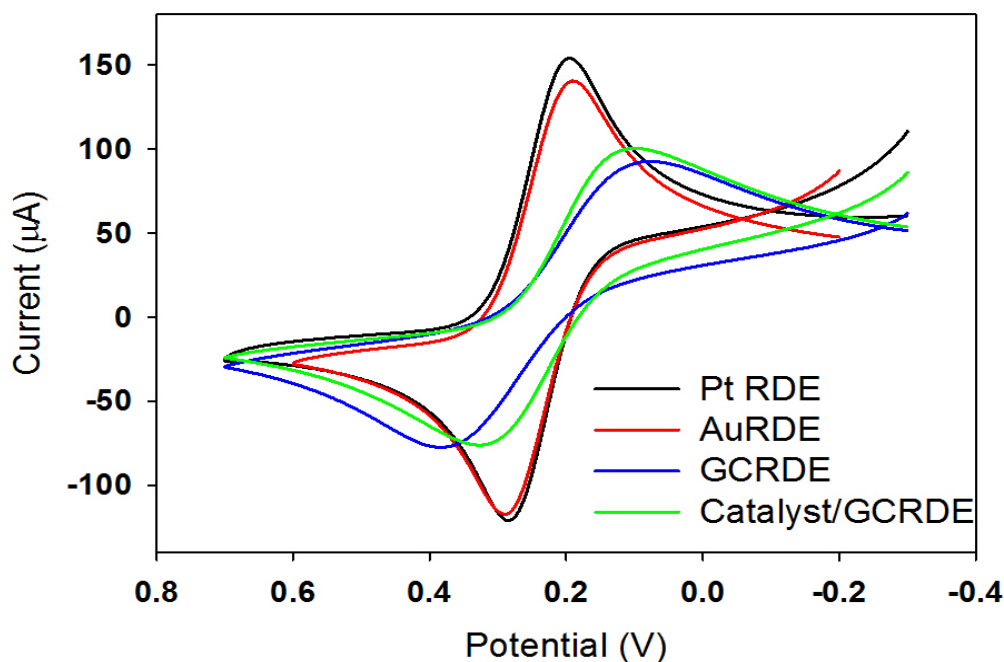

74

75 Figure S5: Cyclic voltammetry of ferricyanide redox peak in 0.1M  $\text{KNO}_3$  solution

76 Table S2: Koutecky-Levich plot values calculation for ORR.

| Levich equation                                                                   |       |        | Koutecky-Levich equation |                  |        |        |                     |       |
|-----------------------------------------------------------------------------------|-------|--------|--------------------------|------------------|--------|--------|---------------------|-------|
| <b>Pt disk</b> (Area = 0.0614 cm <sup>2</sup> , Applied potential = -0.38 V)      |       |        |                          |                  |        |        |                     |       |
| $\omega$<br>(rpm)                                                                 | i     | j      | $\omega$<br>(rad/s)      | $\omega^{(1/2)}$ | 1/j    | 1/B    | 1/ $\omega^{(1/2)}$ | 1/jk  |
| 150                                                                               | 0.319 | 4.6366 | 15.7079                  | 3.963            | 0.1925 | 0.6554 | 0.2523              | 0.024 |
| 200                                                                               | 0.361 | 5.2470 | 20.9439                  | 4.576            | 0.1701 |        | 0.2185              |       |
| 250                                                                               | 0.396 | 5.7558 | 26.1799                  | 5.116            | 0.1551 |        | 0.1954              |       |
| 300                                                                               | 0.424 | 6.1627 | 31.4159                  | 5.604            | 0.1448 |        | 0.1784              |       |
| 500                                                                               | 0.526 | 7.6453 | 52.3598                  | 7.235            | 0.1167 |        | 0.1382              |       |
| 750                                                                               | 0.623 | 9.0552 | 78.5398                  | 8.86             | 0.0986 |        | 0.1129              |       |
| 1000                                                                              | 0.687 | 9.9854 | 104.719                  | 10.23            | 0.0894 |        | 0.0978              |       |
| <b>Au disk</b> (Area = 0.0588 cm <sup>2</sup> , Applied potential = -0.38 V)      |       |        |                          |                  |        |        |                     |       |
| 150                                                                               | 0.15  | 2.5510 | 15.7079                  | 3.963            | 0.3920 | 1.176  | 0.2523              | 0.093 |
| 200                                                                               | 0.165 | 2.8061 | 20.9439                  | 4.576            | 0.3564 |        | 0.2185              |       |
| 250                                                                               | 0.18  | 3.0612 | 26.1799                  | 5.116            | 0.3267 |        | 0.1954              |       |
| 300                                                                               | 0.192 | 3.2653 | 31.4159                  | 5.604            | 0.3063 |        | 0.1784              |       |
| 500                                                                               | 0.227 | 3.8605 | 52.3598                  | 7.235            | 0.2590 |        | 0.1382              |       |
| 750                                                                               | 0.261 | 4.4387 | 78.5398                  | 8.86             | 0.2253 |        | 0.1129              |       |
| 1000                                                                              | 0.288 | 4.8979 | 104.719                  | 10.23            | 0.2042 |        | 0.0978              |       |
| <b>GC disk</b> (Area = 0.0389 cm <sup>2</sup> , Applied potential = -0.9 V)       |       |        |                          |                  |        |        |                     |       |
| 150                                                                               | 0.134 | 3.4447 | 15.7079                  | 3.963            | 0.2903 | 0.7944 | 0.2523              | 0.091 |
| 200                                                                               | 0.148 | 3.8046 | 20.9439                  | 4.576            | 0.2628 |        | 0.2185              |       |
| 250                                                                               | 0.159 | 4.0874 | 26.1799                  | 5.116            | 0.2447 |        | 0.1954              |       |
| 300                                                                               | 0.167 | 4.2930 | 31.4159                  | 5.604            | 0.2329 |        | 0.1784              |       |
| 500                                                                               | 0.198 | 5.0899 | 52.3598                  | 7.235            | 0.1965 |        | 0.1382              |       |
| 750                                                                               | 0.222 | 5.7069 | 78.5398                  | 8.86             | 0.1752 |        | 0.1129              |       |
| 1000                                                                              | 0.229 | 5.8868 | 104.719                  | 10.23            | 0.1699 |        | 0.0978              |       |
| <b>GC+Catalyst</b> (Area = 0.04087 cm <sup>2</sup> , Applied potential = -0.38 V) |       |        |                          |                  |        |        |                     |       |
| 150                                                                               | 0.179 | 4.3797 | 15.7079                  | 3.963            | 0.2283 | 0.637  | 0.2523              | 0.055 |
| 200                                                                               | 0.197 | 4.8202 | 20.9439                  | 4.576            | 0.2075 |        | 0.2185              |       |
| 250                                                                               | 0.211 | 5.1627 | 26.1799                  | 5.116            | 0.1937 |        | 0.1954              |       |
| 300                                                                               | 0.227 | 5.5541 | 31.4159                  | 5.604            | 0.1800 |        | 0.1784              |       |
| 500                                                                               | 0.27  | 6.6063 | 52.3598                  | 7.235            | 0.1514 |        | 0.1382              |       |
| 750                                                                               | 0.309 | 7.5752 | 78.5398                  | 8.86             | 0.1320 |        | 0.1129              |       |
| 100<br>0                                                                          | 0.338 | 8.2701 | 104.719                  | 10.23            | 0.1209 |        | 0.0978              |       |

|  |  |  |  |  |   |      |    |       |
|--|--|--|--|--|---|------|----|-------|
|  |  |  |  |  | n | 3.69 | ik | 18.17 |
|--|--|--|--|--|---|------|----|-------|

77

78

79

80

81

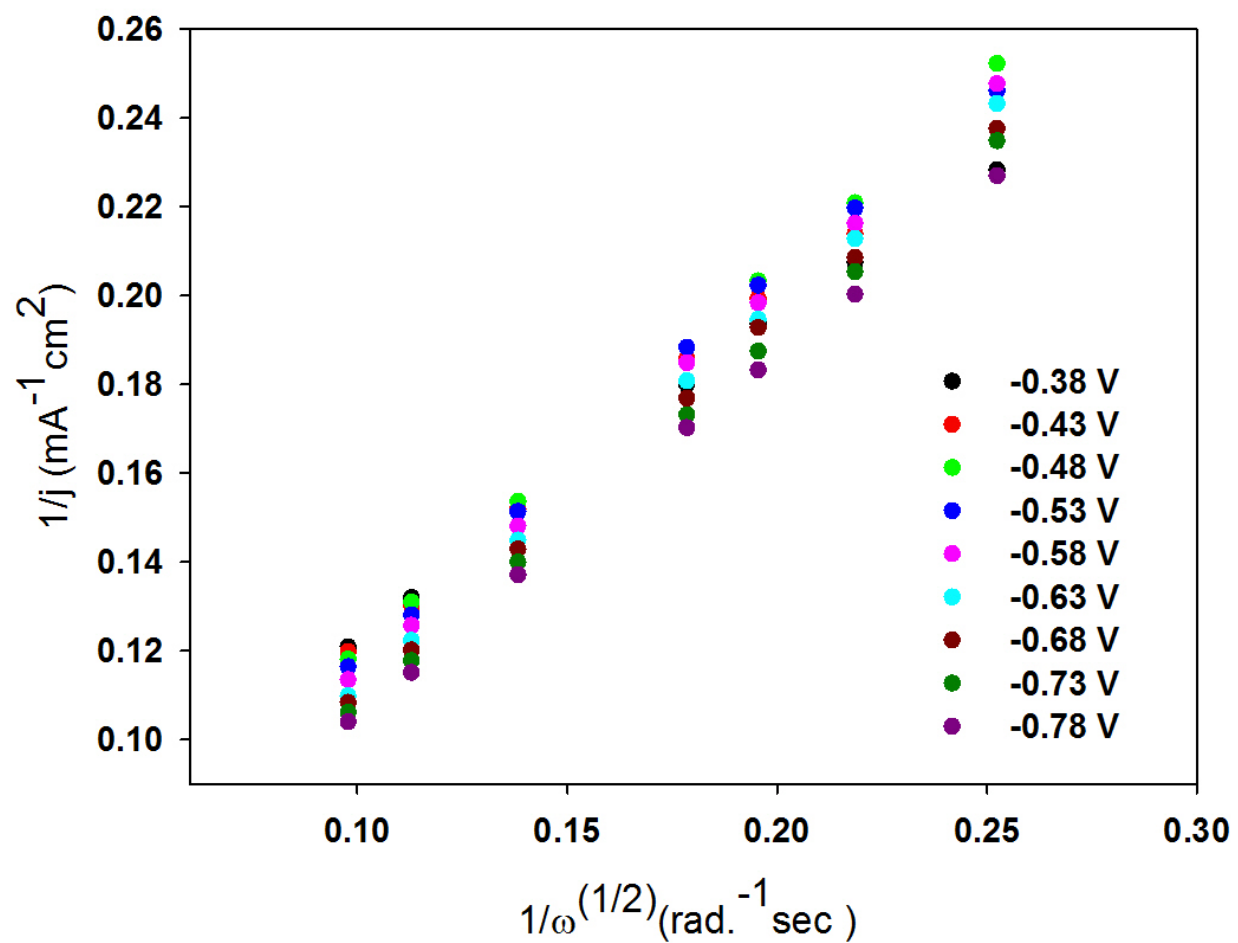

82

83 Figure S6: K-L Plots from Figure 4C RDE diffusion curve of different electrode potentials.

84



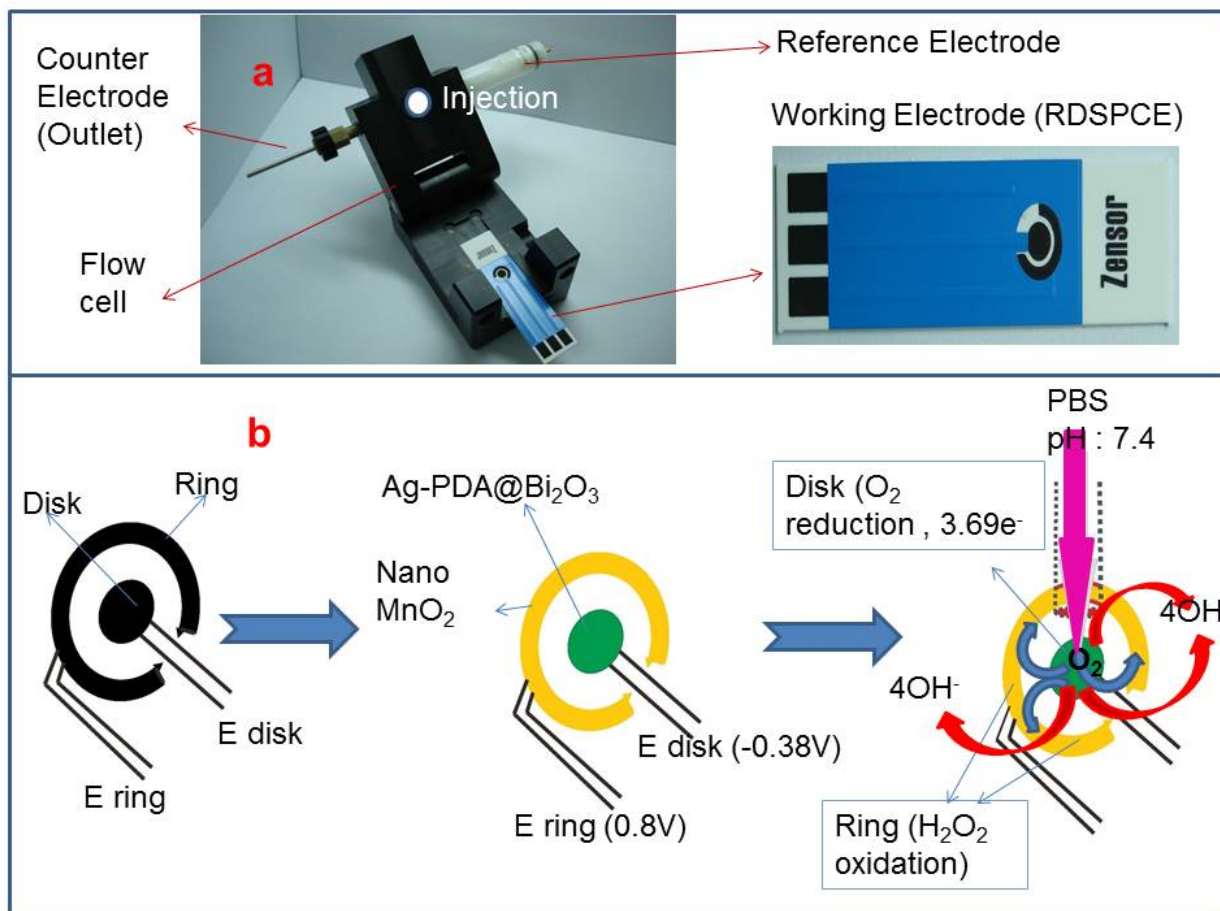

85

86 Figure S7: Picture of the Flow Injection Analysis system for H<sub>2</sub>O<sub>2</sub> monitoring. (a) Flow cell

87 setup and working principle. (b) H<sub>2</sub>O<sub>2</sub> monitoring in ORR at Ring and Disk electrode.

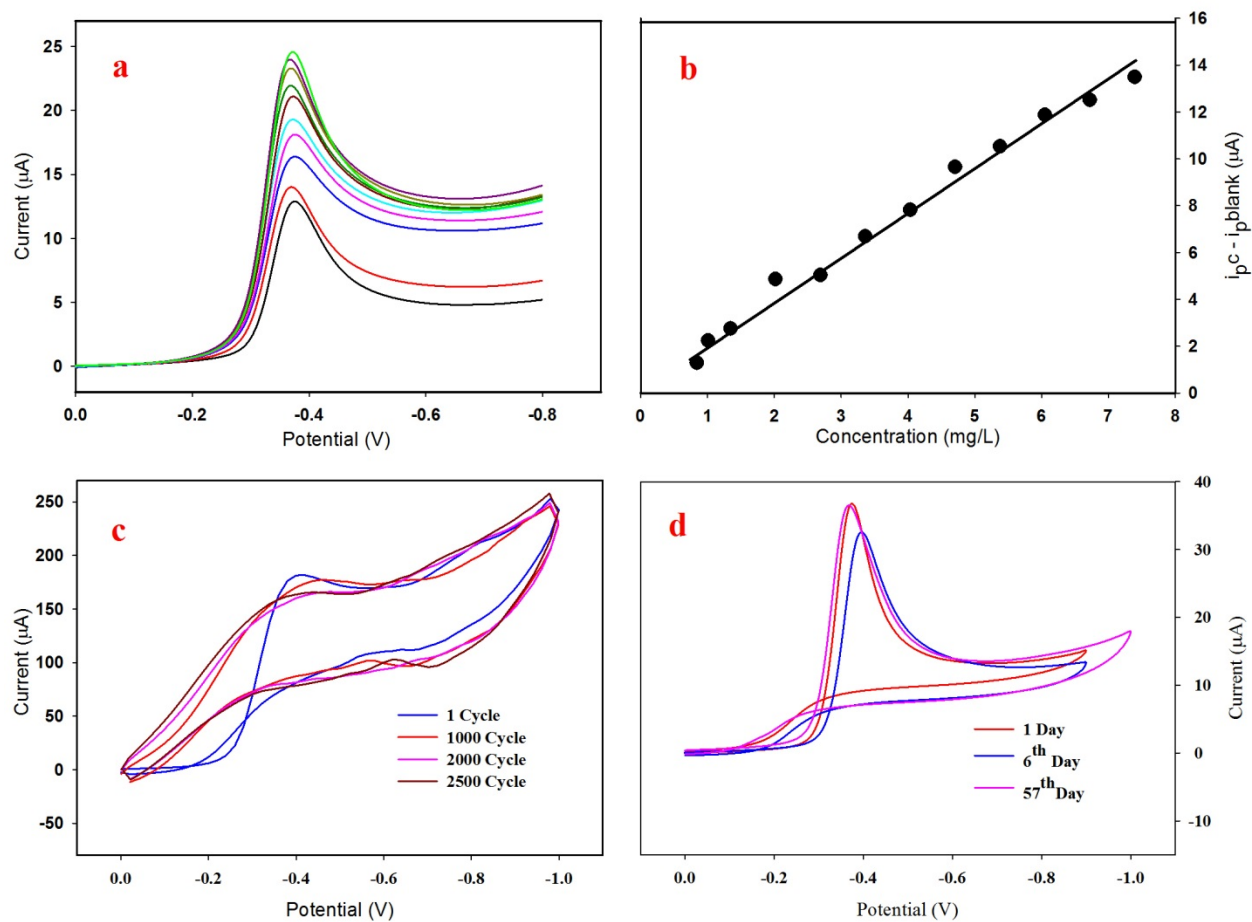

88

89 Figure S8: Calibration curve for dissolved Oxygen determination by Linear Sweep  
 90 Voltammetry (a) ( $O_2$  concentration from black to green is 0.84, 1.34, 2.02, 2.69, 3.36, 4.03,  
 91 4.70, 5.38, 6.05, 6.72, 7.39 mg/L) and linear range for dissolved oxygen (b). CV stability of  
 92 at after 1000, 2000, 2500 cycle in  $O_2$  saturated solution, scan rate 200 mV/s (c). Long time  
 93 stability CV in dissolved oxygen medium at different days, scan rate 20 mV/s (d).
